# Supplementary material
Source: MDPI journal article supplement (https://www.mdpi.com/2076-3417/11/7/3136)
Supplement: s1 [file s1]

# A novel thermostable keratinase from *Deinococcus geothermalis* with potential application in feather degradation

Yin Tang<sup>1</sup>, Leizhou Guo<sup>1</sup>, Mingming Zhao<sup>2</sup>, Yuan Gui<sup>1</sup>, Jiahui Han<sup>2</sup>, Qilin Dai<sup>1</sup>, Shijie Jiang<sup>1</sup>, Min Lin<sup>2</sup>, Zhengfu Zhou<sup>2,\*</sup>, Jin Wang<sup>1,2,\*</sup>

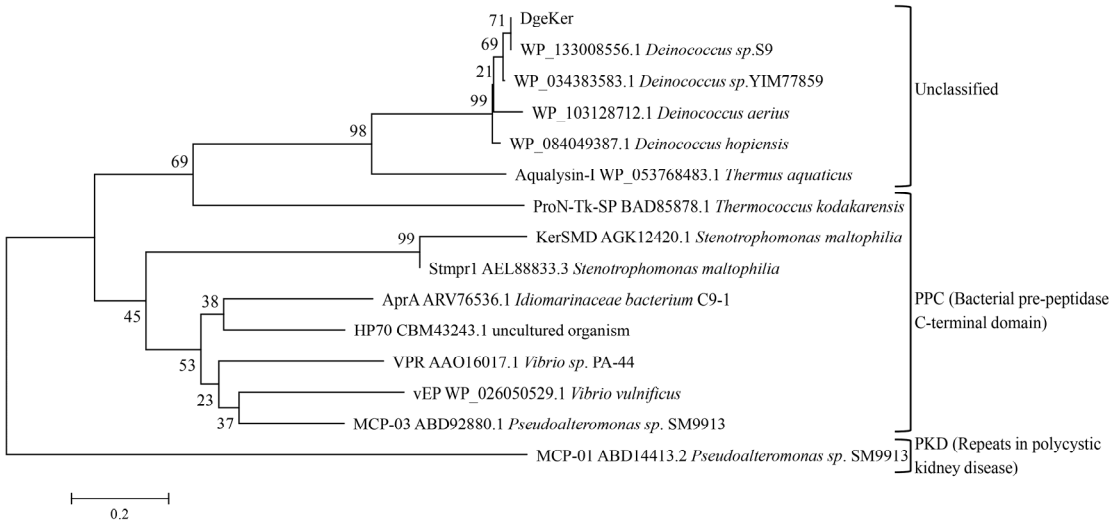

**Figure S1.** Phylogenetic analysis of C-terminal extension of DgeKer and other keratinases. The C-terminal extension used were from Aqualysin-I, ProN-Tk-SP and other keratinases. The name and GenBank accession No. for each keratinase are in front of the Latin name of each strain. The classification of C-terminal extension is shown following one-sided brackets. The phylogenetic tree derived by the Neighbor-Joining method. The percentages of replicate trees in which the associated taxa clustered together in the bootstrap test (1000 replicates) are shown next to the branches.

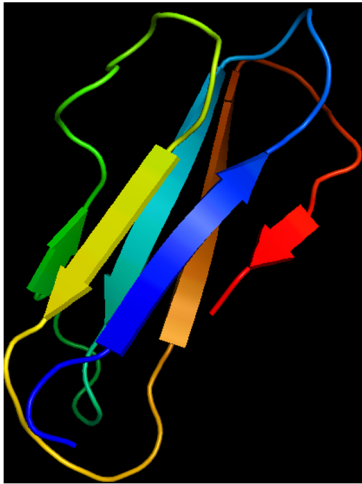

**Figure S2.** Modeled structure of C-terminal extension of DgeKer using Pymol software. Structure of ProN-Tk-SP from *Thermococcus kodakaraensis* (PDB ID: 3AFG) was used as template. The secondary structural elements are represented in cartoon model.
